# Supplementary material for: TreeSatAI Benchmark Archive: A multi-sensor, multi-label dataset for tree species classification in remote sensing
Source: Copernicus journal article supplement (doi:10.5194/essd-2022-312), 2022-09-26
Supplement: Supplementary file [file essd-2022-312-RC1-supplement.pdf]

Ahlswede et al introduce the TreeSatAI Benchmark Archive, a new data for tree species classification in Central Europe based on multi-sensor data from aerial, Sentinel-1 and Sentinel-2 imagery. This dataset contains labels of 20 European tree species (i.e., 15 tree genera). They also tested deep learning and machine learning models (residual neural networks (ResNet), multi-layer perceptron (MLP) or Light Gradient Boosting Machine (LightGBM) models) performances on this new dataset. This dataset is helpful to pre-train DL models for classifying species.

Overall, the manuscript conducted good work on data collection, statistic analysis, and results presentation. I think it is publishable if several minor issues can be addressed.

1. Figure 4 is not reader-friendly; the font is too small.
2. Introducing the dataset to the community is the main goal of this paper so that the author may include more information about the dataset. For example, in line 87, the description of the dataset itself is too concise.
